# Supplementary material for: Assessing the relationship between fear of cancer recurrence and health care utilization in early-stage breast cancer survivors
Source: Springer Nature journal article supplement (doi:10.1007/s11764-018-0714-8), 2018-10-19
Supplement: MOESM1 [file 16212824]

**Supplemental Materials**

| **Effect** | **Estimate** | ***z*** | ***p*** | ***RR* or *OR*** | **95% CIa** |
| --- | --- | --- | --- | --- | --- |
| *Oncologist Visits* regressed on: |  |  |  | ***RR*** |  |
| *FCR* latent factor | 0.42 | 3.03 | .002 | 1.53 | 1.16, 2.01 |
| *FCR* by *Years since Diagnosis* interaction | 0.02 | 0.25 | .801 | 1.02 | 0.90, 1.14 |
| *Chemotherapy* | 0.40 | 2.27 | .023 | 1.49 | 1.06, 2.09 |
| *Radiation Therapy* | 0.25 | 1.28 | .201 | 1.29 | 0.87, 1.89 |
| *Years since Diagnosis* | -0.23 | -4.72 | <.001 | 0.79 | 0.72, 0.87 |
| *Age at Diagnosis* | 0.02 | 2.31 | .021 | 1.02 | 1.00, 1.04 |
| *PSWQ Mean Score* | -0.01 | -0.09 | .932 | 0.99 | 0.80, 1.23 |
| *Objective Risk of Recurrence* | -0.02 | -1.93 | .054 | 0.98 | 0.96, 1.00 |
| *Number of Comorbidities* | -0.04 | -0.71 | .479 | 0.96 | 0.86, 1.08 |
| *Oncologist Calls* regressed on: |  |  |  | ***RR*** |  |
| *FCR* latent factor | 0.73 | 2.70 | .007 | 2.08 | 1.22, 3.54 |
| *FCR* by *Years since Diagnosis* interaction | 0.16 | 1.35 | .178 | 1.18 | 0.93, 1.49 |
| *Chemotherapy* | 0.51 | 1.53 | .126 | 1.66 | 0.87, 3.19 |
| *Radiation Therapy* | 0.43 | 1.08 | .281 | 1.53 | 0.71, 3.33 |
| *Years since Diagnosis* | -0.24 | -2.27 | .023 | 0.78 | 0.63, 0.97 |
| *Age at Diagnosis* | -0.02 | -1.25 | .211 | 0.98 | 0.95, 1.01 |
| *PSWQ Mean Score* | 0.13 | 0.56 | .574 | 1.13 | 0.73, 1.76 |
| *Objective Risk of Recurrence* | -0.02 | -0.91 | .361 | 0.98 | 0.95, 1.02 |
| *Number of Comorbidities* | 0.05 | 0.45 | .656 | 1.05 | 0.85, 1.30 |
| *PCP Visits* regressed on: |  |  |  | ***RR*** |  |
| *FCR* latent factor | 0.27 | 2.47 | .013 | 1.31 | 1.06, 1.61 |
| *Chemotherapy* | 0.01 | 0.08 | .940 | 1.01 | 0.76, 1.34 |
| *Radiation Therapy* | -0.10 | -0.69 | .488 | 0.90 | 0.68, 1.20 |
| *Years since Diagnosis* | 0.05 | 1.40 | .161 | 1.05 | 0.98, 1.12 |
| *Age at Diagnosis* | 0.01 | 2.03 | .043 | 1.01 | 1.00, 1.03 |
| *PSWQ Mean Score* | -0.00 | -0.03 | .976 | 1.00 | 0.84, 1.19 |
| *Objective Risk of Recurrence* | 0.01 | 1.04 | .299 | 1.01 | 0.99, 1.02 |
| *Number of Comorbidities* | 0.11 | 2.58 | .010 | 1.11 | 1.03, 1.20 |
| *PCP Calls* regressed on: |  |  |  | ***RR*** |  |
| *FCR* latent factor | 0.34 | 1.93 | .054 | 1.39 | 0.99, 1.97 |
| *Chemotherapy* | -0.13 | -0.57 | .571 | 0.87 | 0.55, 1.39 |
| *Radiation Therapy* | 0.16 | 0.63 | .532 | 1.17 | 0.72, 1.90 |
| *Years since Diagnosis* | 0.01 | 0.26 | .793 | 1.01 | 0.91, 1.13 |
| *Age at Diagnosis* | 0.01 | 1.08 | .279 | 1.01 | 0.99, 1.03 |
| *PSWQ Mean Score* | 0.06 | 0.37 | .715 | 1.06 | 0.77, 1.45 |
| *Objective Risk of Recurrence* | 0.01 | 0.76 | .446 | 1.01 | 0.99, 1.03 |
| *Number of Comorbidities* | 0.14 | 2.13 | .033 | 1.15 | 1.01, 1.31 |
| *Mental Health Treatment* regressed on: |  |  |  | ***OR*** |  |
| *FCR* latent factor | 0.24 | 0.91 | .362 | 1.27 | 0.76, 2.12 |
| *Chemotherapy* | 0.47 | 1.43 | .153 | 1.60 | 0.84, 3.05 |
| *Radiation Therapy* | -0.07 | -0.20 | .840 | 0.93 | 0.45, 1.90 |
| *Years since Diagnosis* | -0.02 | -0.22 | .827 | 0.98 | 0.85, 1.16 |
| *Age at Diagnosis* | -0.09 | -4.74 | <.001 | 0.92 | 0.89, 0.95 |
| *PSWQ Mean Score* | 0.10 | 0.47 | .636 | 1.11 | 0.73, 1.68 |
| *Objective Risk of Recurrence* | 0.00 | 0.01 | .991 | 1.00 | 0.97, 1.03 |
| *Number of Comorbidities* | 0.21 | 1.87 | .061 | 1.24 | 0.99, 1.55 |
| **Effect** | **Estimate** | ***z*** | ***p*** | ***RR* or *OR*** | **95% CI*** |
| *Psychotropic Medications* regressed on: |  |  |  | ***OR*** |  |
| *FCR* latent factor | 0.32 | 1.35 | .178 | 1.37 | 0.87, 2.17 |
| *Chemotherapy* | -0.04 | -0.11 | .912 | 0.97 | 0.52, 1.78 |
| *Radiation Therapy* | 0.05 | 0.15 | .877 | 1.05 | 0.54, 2.04 |
| *Years since Diagnosis* | -0.01 | -0.10 | .922 | 0.99 | 0.85, 1.15 |
| *Age at Diagnosis* | -0.04 | -2.80 | .005 | 0.96 | 0.93, 0.99 |
| *PSWQ Mean Score* | 0.50 | 2.52 | .012 | 1.65 | 1.12, 2.43 |
| *Objective Risk of Recurrence* | 0.01 | 0.98 | .328 | 1.01 | 0.99, 1.04 |
| *Number of Comorbidities* | 0.17 | 1.71 | .088 | 1.19 | 0.97, 1.45 |

*Notes.* *RR* = Rate Ratio, *OR* = Odds Ratio. a Confidence intervals (CIs) displayed here have been exponentiated to be on the same scale as *RR*s and *OR*s (see Data Analytic Strategy section of manuscript for explanation of *RR*s and *OR*s). If a CI includes 1, the effect is interpreted as non-significant.
